# Supplementary material
Source: PubMed Central journal article supplement (PMC8983335)
Supplement: mmc1.pdf [file mmc1.pdf]

## Supplementary Information File A for

### **Telomere-length dependent T-Cell clonal expansion: a model linking ageing to COVID-19 T-Cell lymphopenia and mortality**

James J. Anderson<sup>\*</sup>, Abraham Aviv, Ezra Susser, Konstantin G. Arbeev,  
Anatoliy I. Yashin, Daniel Levy<sup>6</sup>, Simon Verhulst

<sup>\*</sup>Corresponding author. Email: [jjand@uw.edu](mailto:jjand@uw.edu)

#### **This file includes:**

Supplementary Text A1 and A2

Figs. S1 to S2

Tables S1

References (1-4)

#### **Other Supplementary Information for this manuscript includes the following:**

Supplementary\_Information\_B.R R code (1) to make model and Figures 2, 3, 4, S1, S1

### **Text A1. Effect of limited clone size (LCS) definition on model response and correlation with observed mortality**

The model assumes that mortality from COVID-19 only occurs when T-cell clonal expansion cannot achieve maximum clone size (MCS). We were unable to *a priori* select how LCS might affect mortality. We explored instead the relationship of mean LCS with years and the Hazards ratio<sub>20</sub> for three cutoff levels used for defining LCS: (I)  $LCS < MCS$ , (II)  $LCS < 0.5 MCS$ , and (III)  $LCS < 0.15 MCS$  (**Figure S1**). In cutoff I, any clone that cannot achieve a MCS is included in the LCS subpopulation and therefore susceptible to SARS-CoV-2 mortality. In cutoff II, only clones that are less than half the MCS are included in the LCS subpopulation and in cutoff III only clones that are less than 15% of the MCS are included.

The percent of the subpopulation in the LCS category (%LCS) increases from ~ 5% at age 20 to ~ 90% at age 90 (**Figure S1a**). These percentages change little between the three cutoff levels. The maximum difference in % LCS in the definitions occurs at age 50 years. This close tracking with age indicates that the LCS cutoff has a minimal effect on the partition of the subpopulations in **Figure 3a,b**. Note that the height of the histogram bars in **Figure 3b** does not depend on the LCS cutoff.

**Figure S1b** illustrates that the LCS cutoff has a strong effect on the mean LCS pattern with age. But for all cutoffs, the mean LCS declines in a nearly linear manner with age. Thus, the assumption of a linear age-dependence of mean LCS with age is unaffected by the LCS cutoff choice.

**Figure S1c** depicts the effect of the LCS cutoff on the hazard ratio<sub>20</sub>. Here, because the cutoffs do not significantly affect linearity of mean LCS with age, they rescale the mean LCS at which the hazards ratio<sub>20</sub> of COVID-19 and non-COVID-19 diverge, which for **Figure 4c** is taken as the critical hazards ratio<sub>20</sub> = 25.4. Then the mean LCS associated with this critical hazards ratio<sub>20</sub> linearly scales with the LCS cutoff as  $\overline{LCS}_{crit} = 0.142LCS_{cutoff}$ .

In sum, the cutoff level changes the critical mean LCS at which the COVID-19 and non-COVID-19 hazards ratios<sub>20</sub> diverge but this critical level is proportional to the cutoff level. Thus, a significant divergence of COVID-19 and non-COVID-19 hazards ratios<sub>20</sub> is robust to the definition of the CS level susceptible to mortality.

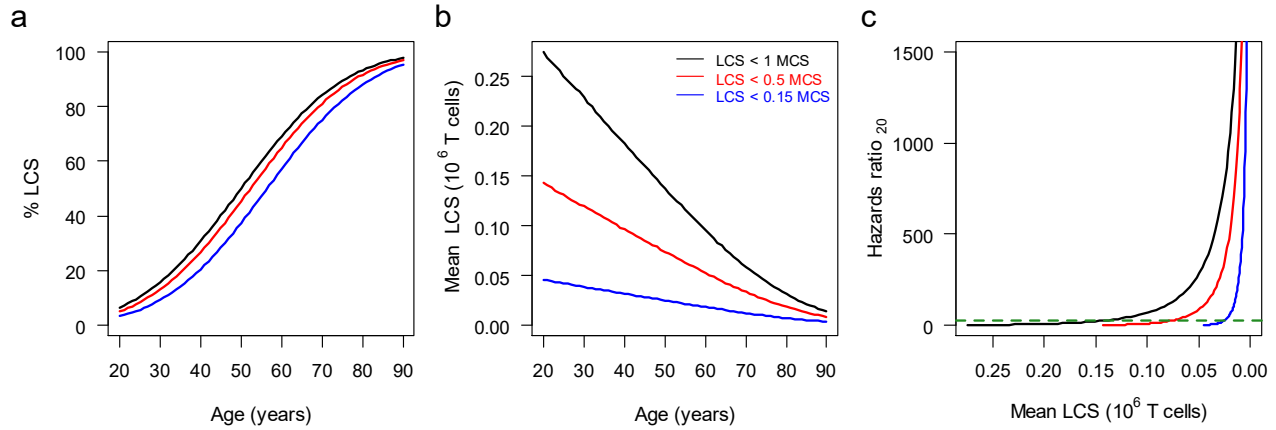

**Figure S1. Model properties with three LCS cutoff levels:** LCL < 1.0 MCS (—), LCL < 0.5 MCS (—) and LCL < 0.15 MCS (—). (a) % of population in LCS group by age for cutoff levels, (b) mean LCS vs age for cutoff levels, (c) hazards ratio<sub>20</sub> vs mean LCS for cutoff levels. Dashed line (—) depicts hazards ratio<sub>20</sub> (25.4) at which COVID-19 and non-COVID-19 mortalities diverge.

### Text A2. Effects of parameter estimates on model response

Parameters (MCS, LCS,  $X_0$ ,  $TL_0$ ,  $g$ ,  $r$ ,  $TL_B$ ,  $TL_{20}$ , and  $\Delta_{max}$ , **Table 1** in the paper) were derived from published data (**Table S1** shows references). To demonstrate the contribution of these terms to the model uncertainty, we use the propagation of error approach assuming uncorrelated terms. Based on the equation  $X_0 = 20 + (TL_{20} - TL_B - \Delta_{max})/g$  the uncertainty in the  $TL_0$  measures is

$$\sigma_{X_0}^2 \approx \frac{1}{g^2} \left( \sigma_{TL_B}^2 + \sigma_{\Delta_{max}}^2 + (X_0 - 20)^2 \sigma_g^2 \right) \quad (S1)$$

$$\sigma_{TL_0}^2 = \sigma_{TL_B}^2 + \sigma_{\Delta_{max}}^2$$

To estimate uncertainty of CS, first define the number of T-cell replications in clone expansion as  $N_X = (TL_{20} - g(X - 20) - TL_B)/r$  where age is  $X$ . Then variance in replications is

$$\sigma_{N_X}^2 \approx \frac{1}{r^2} \left( \sigma_{TL_B}^2 + (X - 20)^2 \sigma_g^2 + N_X^2 \sigma_r^2 \right) \quad (S2)$$

Next, to estimate uncertainty in CS, define the clone size in terms of the number of replications as  $CS = 2^{N_X}$ , then the variance in the CS for a clone with limited expansion capacity is

$$\sigma_{\text{LCS}_X}^2 \approx (\ln(2)2^{N_X})^2 \sigma_{N_X}^2 \quad (\text{S3})$$

and the variance on MCS is calculated from Eq. (S3) by setting X to  $X_0$  giving

$$\sigma_{\text{MCS}}^2 \approx (\ln(2)2^{N_{X_0}})^2 \sigma_{N_{X_0}}^2 \quad (\text{S4})$$

The uncertainties for these measures are calculated using the parameter estimates and standard deviations given in **Table S1**.

The uncertainty in the TL of the  $\text{TL}_0$  from Eq. (S1) is  $\sigma_{\text{TL}_0} = 0.1$  kb, or 1.5%. The uncertainty in  $X_0$  depends on  $\text{TL}_{20}$ . **Figure S2a** shows that the uncertainty varies slightly with  $\text{TL}_{20}$ . Using the population mean  $\text{TL}_{20}$  of 7.3 kb the uncertainty is  $\sigma_{X_0} \sim 3.4$  years.

The uncertainty in CS and number of replications depend on age X (**Figure S2b,c**). In the figure, the uncertainty is normalized by measures prior to  $\text{TL}_0$ , i.e.,  $N_{\text{max}} = 20$  and  $\text{MCS} = 2^{20}$ . In panels **b** and **c**, the relative uncertainties decrease after the  $\text{TL}_0$ , here set to  $X_0 = 50$  years to represent individuals with average  $\text{TL}_{20}$  of 7.3 kb. Notably, the large uncertainty in the MCS is wholly dominated by  $\sigma_r$  through Eq. (S2). While the uncertainty in CS is significant, the properties of the model are expressed in terms of the ratio CS/MCS and not the actual value of MCS.

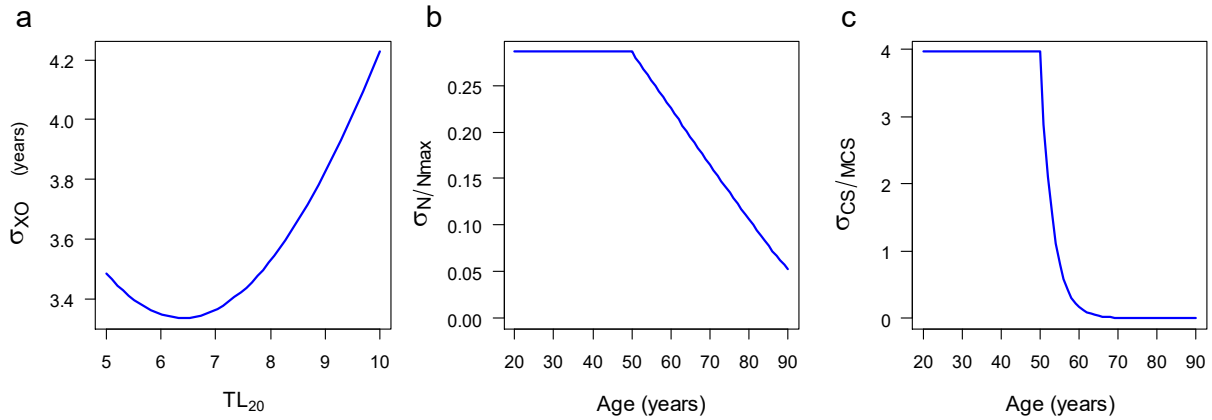

**Figure S2. Uncertainty in parameter estimates.** (a) Uncertainty in  $X_0$  with  $\text{TL}_{20}$ . (b) Uncertainty in clone replication number (N) with age normalized by  $N_{\text{max}}$ . (c) Uncertainty with age in CS normalized by the MCS.

**Table S1. Parameter estimates and uncertainties.**

| parameter                | value   | units          | Reference |
|--------------------------|---------|----------------|-----------|
| $\sigma_{\Delta_{\max}}$ | 0.1     | kb             | 2         |
| $\sigma_B$               | 0.0034  | kb             | 3, 4      |
| $\sigma_g$               | 0.00065 | kb/year        | 2         |
| $\sigma_r$               | 0.02    | kb/replication | 4         |
| $\Delta_{\max}$          | 1.4     | kb             | 4         |
| $TL_B$                   | 5       | kb             | 2         |
| $TL_{20}$                | 5-9     | kb             | 5         |
| $g$                      | 0.03    | kb/year        | 2         |
| $r$                      | 0.07    | kb/replication | 2         |

**SI References**

1. R Core Team. R: A language and environment for statistical computing. Vienna, Austria: R Foundation for Statistical Computing; 2021.
2. Steenstra T, Hjelmborg JV, Kark JD, Christensen K, Aviv A. The telomere lengthening conundrum--artifact or biology? *Nucleic Acids Res.* 2013;41(13):e131.
3. Aviv A, Hunt SC, Lin J, Cao X, Kimura M, Blackburn E. Impartial comparative analysis of measurement of leukocyte telomere length/DNA content by Southern blots and qPCR. *Nucleic Acids Res.* 2011;39(20):e134-e.
4. Weng NP, Hathcock KS, Hodes RJ. Regulation of telomere length and telomerase in T and B cells: a mechanism for maintaining replicative potential. *Immunity.* 1998;9(2):151-7.
5. Steenstrup T, Kark JD, Verhulst S, Thinggaard M, Hjelmborg JVB, Dalgård C, et al. Telomeres and the natural lifespan limit in humans. *Aging.* 2017;9(4):1130-42.
